# Supplementary material for: Treatment outcome of children with persistent Diarrhoea admitted to an Urban Hospital, Dhaka during 2012–2013
Source: PubMed Central journal article supplement (PMC5469056; doi:10.1186/s12887-017-0896-7), 2017-06-12
Supplement: 12887_2017_896_MOESM1_ESM.pdf [file 12887_2017_896_MOESM1_ESM.pdf]

## Additional file 1

| Characteristic      | Children age ≤6 months |                   |                              |                              | Children age >6 months |                   |                              |                              |
|---------------------|------------------------|-------------------|------------------------------|------------------------------|------------------------|-------------------|------------------------------|------------------------------|
|                     | Number of children     | Days of follow-up | Number of recovered children | Recovery rate per child-year | Number of children     | Days of follow-up | Number of recovered children | Recovery rate per child-year |
| Child sex           |                        |                   |                              |                              |                        |                   |                              |                              |
| Male                | 95                     | 641               | 88                           | 50.11                        | 184                    | 1565              | 179                          | 41.75                        |
| Female              | 40                     | 260               | 37                           | 51.94                        | 107                    | 715               | 101                          | 51.56                        |
| Still breastfeeding |                        |                   |                              |                              |                        |                   |                              |                              |
| No                  | 42                     | 242               | 39                           | 58.82                        | 93                     | 725               | 91                           | 45.81                        |
| Yes                 | 93                     | 659               | 86                           | 47.63                        | 198                    | 1555              | 189                          | 44.36                        |
| Severe underweight  |                        |                   |                              |                              |                        |                   |                              |                              |
| No                  | 90                     | 567               | 85                           | 54.72                        | 223                    | 1711              | 217                          | 46.29                        |
| Yes                 | 45                     | 334               | 40                           | 43.71                        | 68                     | 569               | 63                           | 40.41                        |
| Severe stunting     |                        |                   |                              |                              |                        |                   |                              |                              |
| No                  | 116                    | 687               | 109                          | 57.91                        | 262                    | 2059              | 253                          | 44.85                        |
| Yes                 | 19                     | 214               | 16                           | 27.29                        | 29                     | 221               | 27                           | 44.59                        |
| Severe wasting      |                        |                   |                              |                              |                        |                   |                              |                              |
| No                  | 106                    | 661               | 100                          | 55.22                        | 237                    | 1758              | 228                          | 47.34                        |
| Yes                 | 29                     | 240               | 25                           | 38.02                        | 54                     | 522               | 52                           | 36.36                        |
| Dehydration         |                        |                   |                              |                              |                        |                   |                              |                              |
| No                  | 72                     | 496               | 65                           | 47.83                        | 156                    | 1112              | 150                          | 49.24                        |
| Yes                 | 63                     | 405               | 60                           | 54.07                        | 135                    | 1168              | 130                          | 40.63                        |
| Drinking water      |                        |                   |                              |                              |                        |                   |                              |                              |
| Tube Well           | 25                     | 161               | 24                           | 54.41                        | 49                     | 397               | 44                           | 40.45                        |
| Supply water        | 110                    | 740               | 101                          | 49.82                        | 242                    | 1883              | 236                          | 45.75                        |
| Residence type      |                        |                   |                              |                              |                        |                   |                              |                              |
| None slum           | 131                    | 865               | 121                          | 51.06                        | 277                    | 2160              | 266                          | 44.95                        |
| Slum                | 4                      | 36                | 4                            | 40.56                        | 14                     | 120               | 14                           | 42.58                        |

| Characteristic              | Children age ≤6 months |                   |                              |                              | Children age >6 months |                   |                              |                              |
|-----------------------------|------------------------|-------------------|------------------------------|------------------------------|------------------------|-------------------|------------------------------|------------------------------|
|                             | Number of children     | Days of follow-up | Number of recovered children | Recovery rate per child-year | Number of children     | Days of follow-up | Number of recovered children | Recovery rate per child-year |
| Co-morbidity condition      |                        |                   |                              |                              |                        |                   |                              |                              |
| None                        | 43                     | 232               | 42                           | 66.08                        | 91                     | 641               | 90                           | 51.25                        |
| Hospital acquired infection |                        |                   |                              |                              |                        |                   |                              |                              |
| Pneumonia                   | 10                     | 98                | 10                           | 37.24                        | 41                     | 410               | 40                           | 35.61                        |
| URTI                        | 14                     | 64                | 14                           | 79.84                        | 17                     | 105               | 17                           | 59.10                        |
| UTI                         | 9                      | 67                | 9                            | 49.03                        | 25                     | 185               | 25                           | 49.32                        |
| Others**                    | 5                      | 27                | 4                            | 54.07                        | 9                      | 74                | 8                            | 39.46                        |
| WBC status                  |                        |                   |                              |                              |                        |                   |                              |                              |
| Normal                      | 111                    | 772               | 103                          | 48.70                        | 253                    | 2001              | 244                          | 44.51                        |
| Abnormal                    | 24                     | 129               | 22                           | 62.25                        | 38                     | 279               | 36                           | 47.10                        |
| Neutrophil status           |                        |                   |                              |                              |                        |                   |                              |                              |
| Normal                      | 54                     | 472               | 47                           | 36.35                        | 134                    | 1218              | 130                          | 38.96                        |
| Low                         | 75                     | 412               | 75                           | 66.44                        | 141                    | 937               | 137                          | 53.37                        |
| High                        | 1                      | 5                 | 1                            | 73.00                        | 7                      | 84                | 7                            | 30.42                        |
| Lymphocyte status           |                        |                   |                              |                              |                        |                   |                              |                              |
| Normal                      | 36                     | 297               | 31                           | 38.10                        | 98                     | 877               | 95                           | 39.54                        |
| Low                         | 2                      | 12                | 2                            | 60.83                        | 11                     | 139               | 11                           | 28.88                        |
| High                        | 92                     | 580               | 90                           | 56.64                        | 173                    | 1223              | 168                          | 50.14                        |
| Monocyte status             |                        |                   |                              |                              |                        |                   |                              |                              |
| Normal                      | 96                     | 690               | 90                           | 47.61                        | 222                    | 1727              | 214                          | 45.23                        |
| Low                         | 2                      | 19                | 2                            | 38.42                        | 3                      | 26                | 3                            | 42.12                        |
| High                        | 32                     | 180               | 31                           | 62.86                        | 57                     | 486               | 57                           | 42.81                        |
| Invasive diarrhea           |                        |                   |                              |                              |                        |                   |                              |                              |
| No                          | 126                    | 830               | 117                          | 51.45                        | 271                    | 2143              | 262                          | 44.62                        |
| Yes                         | 9                      | 71                | 8                            | 41.13                        | 20                     | 137               | 18                           | 47.96                        |
| Urine pus cells             |                        |                   |                              |                              |                        |                   |                              |                              |

| Characteristic        | Children age ≤6 months |                   |                              |                              | Children age >6 months |                   |                              |                              |
|-----------------------|------------------------|-------------------|------------------------------|------------------------------|------------------------|-------------------|------------------------------|------------------------------|
|                       | Number of children     | Days of follow-up | Number of recovered children | Recovery rate per child-year | Number of children     | Days of follow-up | Number of recovered children | Recovery rate per child-year |
| Normal                | 121                    | 784               | 111                          | 51.68                        | 248                    | 1889              | 239                          | 46.18                        |
| Abnormal              | 14                     | 117               | 14                           | 43.68                        | 43                     | 391               | 41                           | 38.27                        |
| Urine protein         |                        |                   |                              |                              |                        |                   |                              |                              |
| Normal                | 59                     | 372               | 57                           | 55.93                        | 141                    | 1011              | 138                          | 49.82                        |
| Abnormal              | 76                     | 529               | 68                           | 46.92                        | 150                    | 1269              | 142                          | 40.84                        |
| Any pathogen detected |                        |                   |                              |                              |                        |                   |                              |                              |
| No                    | 121                    | 800               | 113                          | 51.56                        | 259                    | 1978              | 249                          | 45.95                        |
| Yes                   | 14                     | 101               | 12                           | 43.37                        | 32                     | 302               | 31                           | 37.47                        |
| Antibiotic used       |                        |                   |                              |                              |                        |                   |                              |                              |
| No                    | 36                     | 205               | 28                           | 49.85                        | 60                     | 259               | 56                           | 78.92                        |
| Yes                   | 99                     | 696               | 97                           | 50.87                        | 231                    | 2021              | 224                          | 40.46                        |

\*\*Others means Abscess/ Amoebiasis/ Septicaemia/ Tuberculosis/ Typhoid
